# Supplementary material for: Smooth Muscle Myosin Localizes at the Leading Edge and Regulates the Redistribution of Actin-regulatory Proteins during Migration
Source: MDPI journal article supplement (doi:10.3390/cells11152334), 2022-07-29

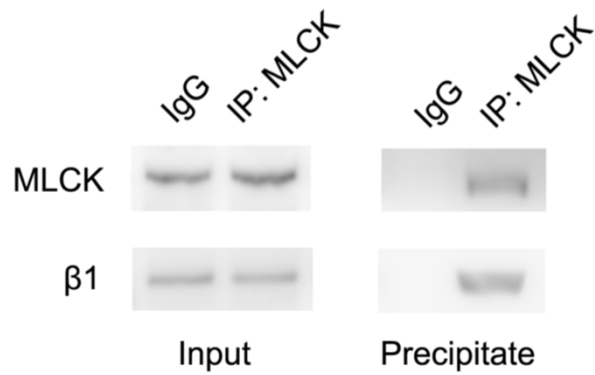

**Figure S1. Interaction of integrin  $\beta 1$  with MLCK.** Input and MLCK immunoprecipitates of human airway smooth muscle cells were assessed by immunoblotting. Integrin  $\beta 1$  is found in MLCK immunoprecipitates. Blots are representative of three identical experiments.

Original blots for Figure 2A

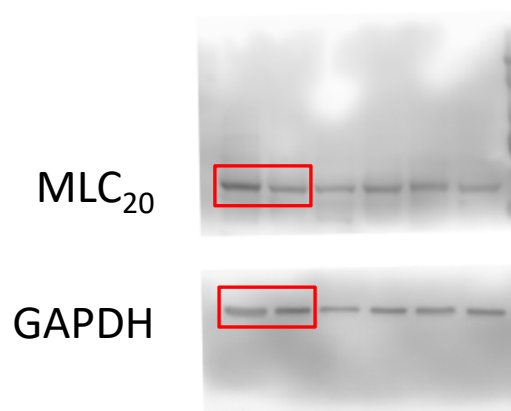

Original blots for Figure 2C

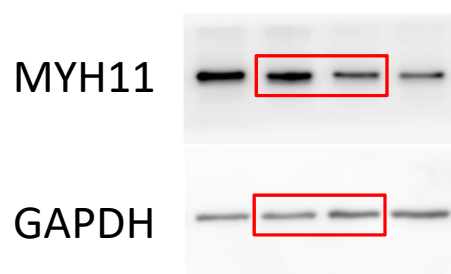

# Original blots for Figure 6A

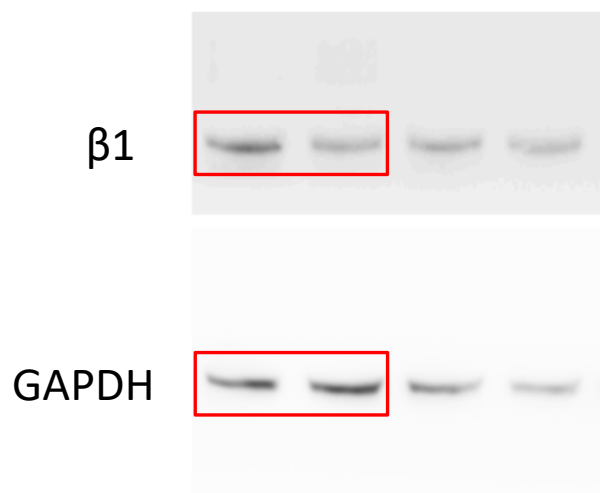

Supplement: s1 [file s1]
